# Supplementary material for: Effects of Acidic Solution on the One-Step Electrodeposition of Prussian Blue Nanocrystals on Screen-Printed Carbon Electrodes Modified with Magnetite Nanoparticles
Source: MDPI journal article supplement (doi:10.3390/chemosensors10080325), 2022-08-11
Supplement: s1 [file s1]

*Supplementary Materials*

# Effects of Acidic Solution on the One-Step Electrodeposition of Prussian Blue Nanocrystals on Screen-Printed Carbon Electrodes Modified with Magnetite Nanoparticles

Man-Mo Tse, Ya-Ling Su and Shu-Hua Cheng \*

Department of Applied Chemistry, National Chi Nan University, Puli 545, Nantou Hsien, Taiwan

\* Correspondence: shcheng@ncnu.edu.tw; Tel.: +886-49-2910960 (ext. 4151); Fax: +886-49-2917956

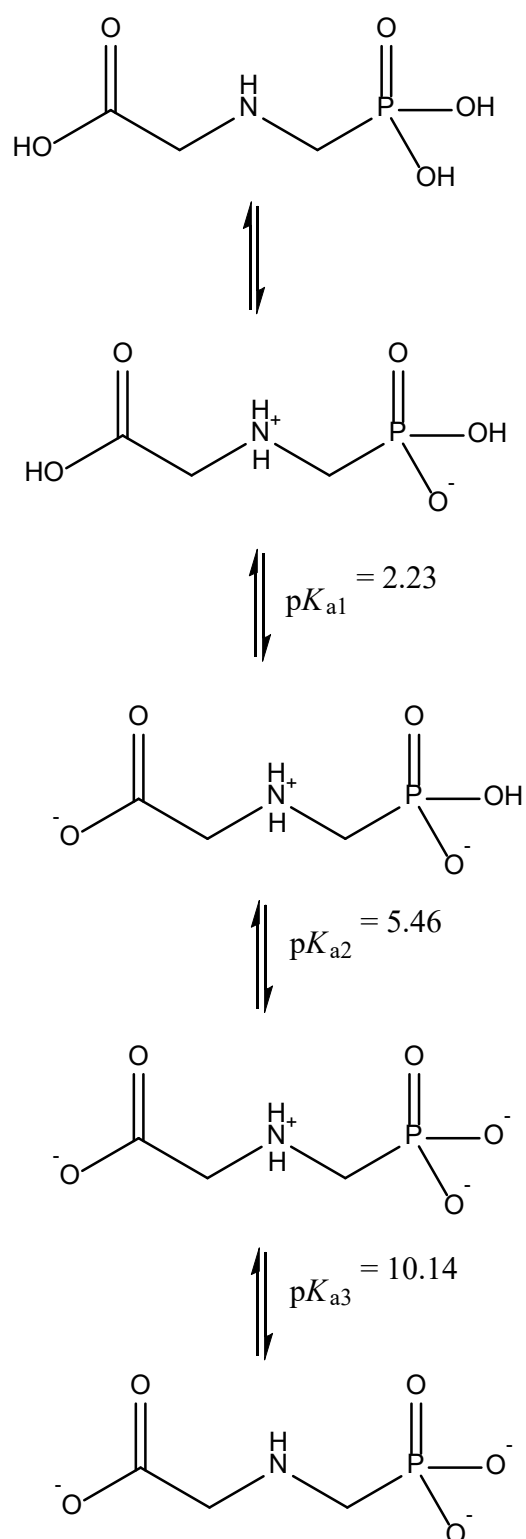

**Figure S1.** The acid dissociation constants of glyphosate and the related species.

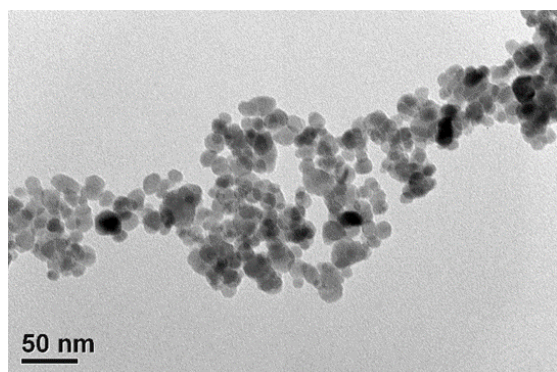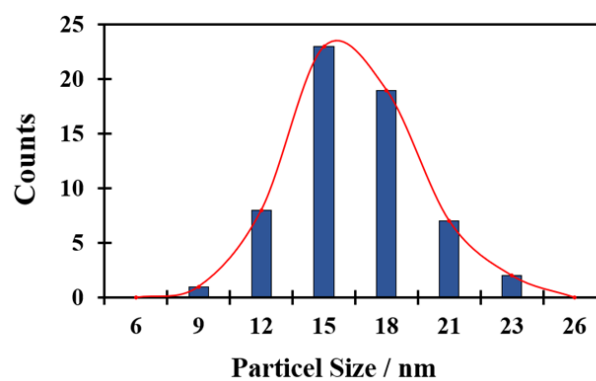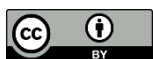

**Copyright:** © 2022 by the authors. Licensee MDPI, Basel, Switzerland. This article is an open access article distributed under the terms and conditions of the Creative Commons Attribution (CC BY) license (<https://creativecommons.org/licenses/by/4.0/>).

(A)

(B)

**Figure S2.** (A) TEM image of nano-Fe<sub>3</sub>O<sub>4</sub> at 400,000X magnification. (B) The corresponding particle size distribution graphs (N = 60).

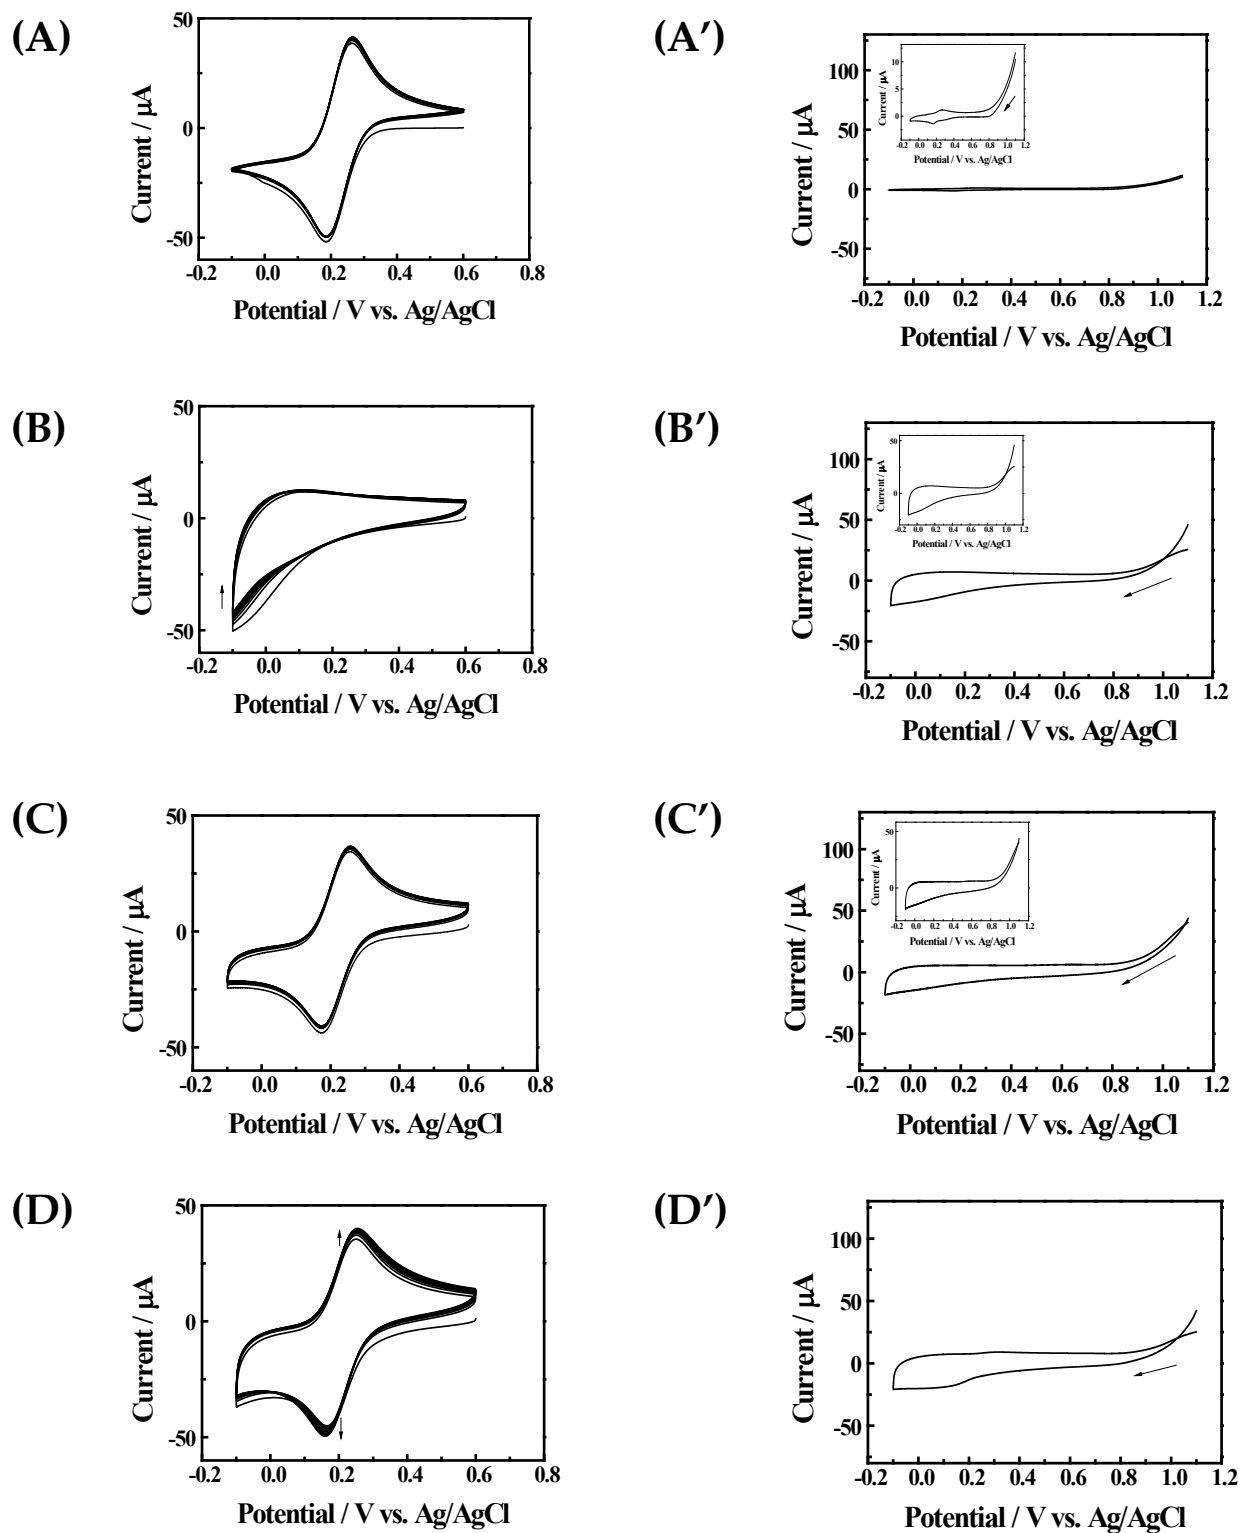

**Figure S3.** (A) Cyclic voltammograms of bare SPCE in solution I for 10 cycles. Cyclic voltammograms of SPCE/nano- $\text{Fe}_3\text{O}_4$  in a mixture solution of (B) 1.0 mM glyphosate and 0.1 M KCl (C) 1.0 mM  $\text{K}_3\text{Fe}(\text{CN})_6$  and 0.1 M KCl solution (D) 1.0 mM  $\text{K}_3\text{Fe}(\text{CN})_6$ , 0.1 M KCl and 1.0 mM AMPA for 10 cycles. (A')(B')(C')(D') Cyclic voltammogram of the resultant electrode, which was obtained after the potential scanning in the corresponding solution and then transferring to 0.1 M KCl. Scan rate =  $0.1 \text{ V s}^{-1}$ .

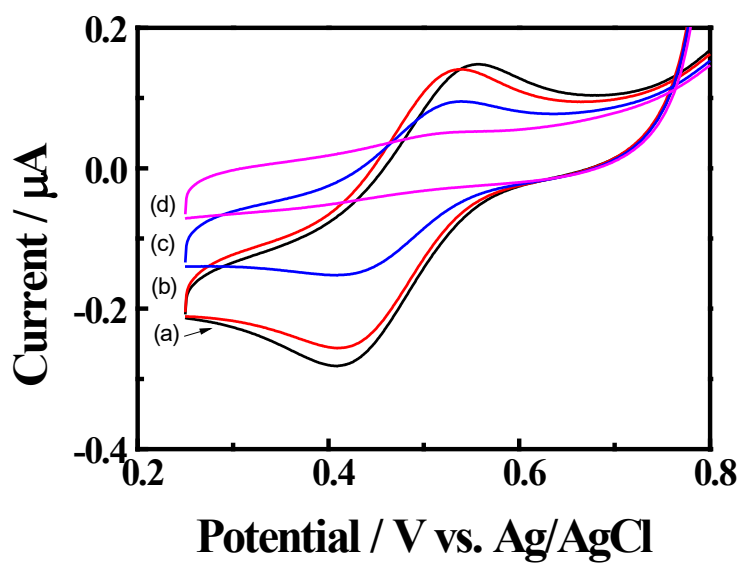

**Figure S4.** Cyclic voltammograms of bare GCE in 0.1 M KCl solution containing 0.2 mM  $\text{FeCl}_3$  and (a) 0 mM, (b) 0.05 mM, (c) 0.1 mM, (d) 0.2 mM glyphosate. Scan rate =  $0.005 \text{ V s}^{-1}$ .

Note:

1. Glassy carbon electrode is used instead of SPCE because of the latter gives redox peaks with large peak-to-peak potential separation.
2. The redox potential of  $\text{Fe}^{3+}/\text{Fe}^{2+}$  shifts negatively from +0.482 V to +0.476 V in the presence of glyphosate (0.05 mM–0.1 mM).
3. Higher concentration of glyphosate (also  $\text{Fe}^{3+}$ ) results in precipitate products.
